# Supplementary material for: Pandemic-associated mobility restrictions could cause increases in dengue virus transmission
Source: PubMed Central journal article supplement (PMC8375978; doi:10.1371/journal.pntd.0009603), 2021-08-09
Supplement: pntd.0009603.s001.pdf [file pntd.0009603.s001.pdf]

## 1 **S1 Text**

2 Our agent-based model (ABM) includes both people and mosquitoes as agents. These agents interact  
3 with each other in an environment represented by a set of locations, including houses, schools, parks,  
4 cemeteries, and churches. This environment also incorporates temporally varying climatic conditions,  
5 which affect mosquito biting frequency, survival, and extrinsic incubation period for dengue virus  
6 (DENV). The environment is based on the city of Iquitos in Peru, and we represent all 92,891 buildings  
7 in the city. We use exact spatial coordinates and location type for the 38,835 locations for which these  
8 data were available. For locations without these data, we randomly distributed the locations and  
9 assigned a location type so that they were evenly spaced and representative of the location types we  
10 had data on.

11 We modeled approximately 450,000 humans in our model, chosen to reflect the demography of  
12 Iquitos and its surroundings [1]. We based the overall age and sex distribution on U.N. estimates of  
13 these for Peru, and based the demographic profile of each household on survey data from a prior study  
14 [2]. This synthetic population also realistically captured how people are distributed across houses and  
15 how demographics changed over time. We achieved this by simulating human births and deaths that  
16 match those estimated by the U.N. for Iquitos and simultaneously preserved realistic household  
17 compositions by placing newborn children in houses with appropriately aged mothers as determined by  
18 U.N. estimates of age-specific fertility of Peru [1]. All human agents in the model went through daily  
19 human movement patterns using a model previously described by Perkins et al. [3], except when this  
20 was modified by lockdown policies which meant they stayed home (see Methods). To describe these  
21 movement patterns, each agent has five daily movement trajectories. At the start of each day one of  
22 these five trajectories is chosen, with equal probability, for each agent. The human movement patterns  
23 were fitted to data from retrospective, semi-structured interviews with inhabitants of Iquitos [4,5].

24 Immature mosquitoes were modeled deterministically and independently at each location. They  
25 transitioned through three immature stages: eggs, larvae, and pupae, with the number of pupae in a

26 house determining the rate of emergence of adult mosquitoes in that house. The rate of transition  
 27 between each of these stages was temperature dependent. All stages also underwent temperature-  
 28 dependent mortality. Larval stages underwent an additional density-dependent mortality [6,7]. Both the  
 29 larval and pupal stages also underwent an additional rate of mortality that was calibrated so that adult  
 30 abundance matched a statistical estimate of the spatio-temporal adult abundance in Iquitos [8]. Adult  
 31 mosquitoes are modeled as agents, and take blood-meals upon co-located human agents. When a  
 32 mosquito takes a blood-meal, the time of its next blood-meal is determined according to an exponential  
 33 distribution with a temperature-dependent gonotrophic rate parameter, based on temporal trends in  
 34 temperature and empirical relationships between these rates and temperature [7,9]. The daily  
 35 gonotrophic rate is

$$36 \quad d_i(T) = \frac{\rho_i \frac{T}{298} \exp\left(\frac{\Delta_{A,i}}{R} \left(\frac{1}{298} - \frac{1}{T_{W,mean}}\right)\right)}{1 + \exp\left(\frac{\Delta_{H,i}}{R} \left(\frac{1}{T_{1/2}} - \frac{1}{T_{W,mean}}\right)\right)},$$

37 where  $T$  is the daily mean temperature in Kelvin and all other parameters are given in S1 Table. When  
 38 the mosquito's next blood-meal is due, it will take it unless there is no human present. This means that  
 39 the number of blood-meals taken by a mosquito is not determined by the local density of humans,  
 40 except in the unusual instance in which no human is present at a location. The mosquito determines  
 41 which human it will bite as a function of the body sizes of humans present at that time – the mosquito  
 42 chooses who to bite with probability proportional to the surface-area of individuals in the building at  
 43 that time [2]. Each day, each mosquito moves to another location with probability 0.3, and will only  
 44 move to a location within 100 m of its starting location, consistent with another agent-based model of  
 45 *Ae. aegypti* population dynamics [6].

46 *S1 Table: definition of parameters governing gonotrophic rate*

| <b>Parameter</b> | <b>Definition</b>                                                            | <b>Gonotrophic cycle</b> |
|------------------|------------------------------------------------------------------------------|--------------------------|
| $\rho_i$         | Development rate per hour at 25°C<br>assuming no temperature inactivation of | 0.00898                  |

|                |                                                                                       |              |
|----------------|---------------------------------------------------------------------------------------|--------------|
|                | the critical enzyme (hr <sup>-1</sup> )                                               |              |
| $\Delta_{A,i}$ | Enthalpy of activation of the reaction catalyzed by the enzyme (cal/mol)              | 15,725.23    |
| $\Delta_{H,i}$ | Enthalpy change associated with high temperature inactivation of the enzyme (cal/mol) | 1,756,481.07 |
| $T_{1/2}$      | Temperature at which 50% of the enzyme is inactivated from high temperature           | 447.17       |

47           When a mosquito takes a blood-meal on a human and one of them is infected, transmission can  
48 occur. The probability that transmission occurs from humans to mosquitoes is determined by the time  
49 since the human was infected, with this probability based on the viremia levels of the infecting human  
50 at the time of the bite [10]. For transmission from mosquitoes to humans, infectious mosquitoes  
51 transmitted DENV to susceptible humans with a fixed probability of 1.0, providing the extrinsic  
52 incubation period has been completed [11,12]. Once infected humans develop symptoms following a  
53 latent period derived from timing of peak viraemia [11]. Following recovery, humans become  
54 permanently immune to that serotype and also have temporary heterologous immunity to all other  
55 serotypes. This temporary immunity lasts for an exponentially distributed period with mean of 686  
56 days, estimated in a previous modeling study of time-varying serotype-specific dengue incidence [13].  
57 The initial level of immunity in the model was calibrated to an analysis of longitudinal serological data  
58 [14].

### 59 *Supplementary References*

- 60 1. Perkins TA, Reiner RC, España G, Ten Bosch QA, Verma A, Liebman KA, et al. An agent-based  
61 model of dengue virus transmission shows how uncertainty about breakthrough infections  
62 influences vaccination impact projections. PLoS Comput Biol. 2019 Mar 20;15(3):e1006710.
- 63 2. Liebman KA, Stoddard ST, Reiner RC, Perkins TA, Astete H, Sihuincha M, et al. Determinants of  
64 Heterogeneous Blood Feeding Patterns by *Aedes aegypti* in Iquitos, Peru. Barrera R, editor. PLoS  
65 Neglected Tropical Diseases. 2014 Feb 13;8(2):e2702.
- 66 3. Perkins TA, Garcia AJ, Paz-Soldán VA, Stoddard ST, Reiner RC, Vazquez-Prokopec G, et al.  
67 Theory and data for simulating fine-scale human movement in an urban environment. J R Soc  
68 Interface [Internet]. 2014 Oct 6 [cited 2018 Oct 5];11(99). Available from:  
69 <https://www.ncbi.nlm.nih.gov/pmc/articles/PMC4233749/>
- 70 4. Paz-Soldan VA, Stoddard ST, Vazquez-Prokopec G, Morrison AC, Elder JP, Kitron U, et al.  
71 Assessing and maximizing the acceptability of global positioning system device use for studying  
72 the role of human movement in dengue virus transmission in Iquitos, Peru. Am J Trop Med Hyg.

- 73 2010 Apr;82(4):723–30.
- 74 5. Paz-Soldan VA, Reiner RC, Morrison AC, Stoddard ST, Kitron U, Scott TW, et al. Strengths and  
75 weaknesses of Global Positioning System (GPS) data-loggers and semi-structured interviews for  
76 capturing fine-scale human mobility: findings from Iquitos, Peru. *PLoS Negl Trop Dis*. 2014  
77 Jun;8(6):e2888.
- 78 6. Magori K, Legros M, Puente ME, Focks DA, Scott TW, Lloyd AL, et al. Skeeter Buster: a  
79 stochastic, spatially explicit modeling tool for studying *Aedes aegypti* population replacement and  
80 population suppression strategies. *PLoS Negl Trop Dis*. 2009 Sep 1;3(9):e508.
- 81 7. Otero M, Solari HG, Schweigmann N. A stochastic population dynamics model for *Aedes*  
82 *aegypti*: formulation and application to a city with temperate climate. *Bull Math Biol*. 2006  
83 Nov;68(8):1945–74.
- 84 8. Reiner RC, Stoddard ST, Vazquez-Prokopec GM, Astete H, Perkins TA, Sihuincha M, et al.  
85 Estimating the impact of city-wide *Aedes aegypti* population control: An observational study in  
86 Iquitos, Peru. *PLoS Negl Trop Dis*. 2019 May;13(5):e0007255.
- 87 9. Focks DA, Haile DG, Daniels E, Mount GA. Dynamic Life Table Model for *Aedes aegypti*  
88 (Diptera: Culicidae): Analysis of the Literature and Model Development. *J Med Entomol*. 1993  
89 Nov 1;30(6):1003–17.
- 90 10. Ten Bosch QA, Clapham HE, Lambrechts L, Duong V, Buchy P, Althouse BM, et al.  
91 Contributions from the silent majority dominate dengue virus transmission. *PLoS Pathog*. 2018  
92 May;14(5):e1006965.
- 93 11. Chan M, Johansson MA. The incubation periods of Dengue viruses. *PLoS ONE*.  
94 2012;7(11):e50972.
- 95 12. Ellis AM, Garcia AJ, Focks DA, Morrison AC, Scott TW. Parameterization and Sensitivity  
96 Analysis of a Complex Simulation Model for Mosquito Population Dynamics, Dengue  
97 Transmission, and Their Control. *Am J Trop Med Hyg*. 2011 Aug 1;85(2):257–64.
- 98 13. Reich Nicholas G., Shrestha Sourya, King Aaron A., Rohani Pejman, Lessler Justin, Kalayanarooj  
99 Siripen, et al. Interactions between serotypes of dengue highlight epidemiological impact of cross-  
100 immunity. *Journal of The Royal Society Interface*. 2013 Sep 6;10(86):20130414.
- 101 14. Reiner RC, Stoddard ST, Forshey BM, King AA, Ellis AM, Lloyd AL, et al. Time-varying,  
102 serotype-specific force of infection of dengue virus. *Proc Natl Acad Sci USA*. 2014 Jul  
103 1;111(26):E2694-2702.
- 104
